# Supplementary material
Source: PubMed Central journal article supplement (PMC3993272)
Supplement: AAC.02693-13_zac005142805so1.pdf [file AAC.02693-13_zac005142805so1.pdf]

## Supplementary materials

### **The mechanism of action of 5-nitrothiophenes against *Mycobacterium tuberculosis***

Ruben C. Hartkoorn<sup>1</sup>, Olga B. Ryabova<sup>2</sup>, Laurent R. Chiarelli<sup>3</sup>, Giovanna Riccardi<sup>3</sup>, Vadim Makarov<sup>2</sup> & Stewart T. Cole<sup>1</sup>#.

<sup>1</sup> Ecole Polytechnique Fédérale de Lausanne, Global Health Institute, Lausanne, Switzerland

<sup>2</sup> A. N. Bakh Institute of Biochemistry, Russian Academy of Science, Moscow, Russia.

<sup>3</sup> Università degli Studi di Pavia, Dipartimento di Biologia e Biotecnologie, Pavia, Italy

## Synthesis of nitrothiophenes

**Figure S1.** Synthetic route for the synthesis of compounds **1-6**

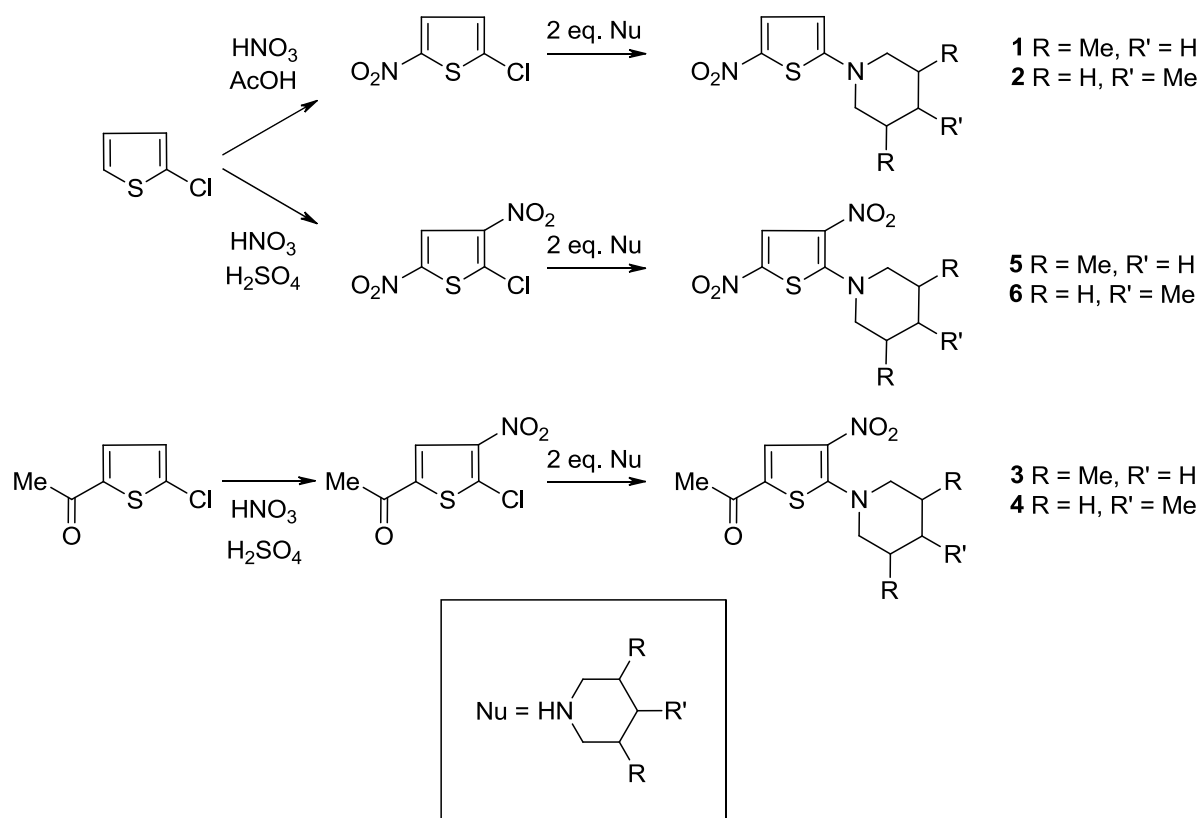

Synthesis of compounds **1**, **2**, **5** and **6** was performed by sequential conversion of 2-chlorothiophene. Treatment of 2-chlorothiophene with nitric acid in acetic acid resulted in formation of 2-nitro-5-chlorothiophene while the same reaction performed in sulfuric acid generated 2,4-dinitro-5-chlorothiophene. These nitro-chlorothiophenes were treated with two equivalents of 4-methylpiperidines or 3,5-dimethylpiperidines in *N,N*-dimethylformamide. The reaction mixture was diluted with water and the resultant precipitate (product) collected by filtration. Compounds **3** and **4** were synthesized similarly starting from 2-acetyl-5-chlorothiophene. All compounds were purified by crystallization from ethanol. Analytical data are presented in Table S1 and the purity of all compounds was >96%.

**Table S1.** Nitrothiophene analytical data

| Cmpd #   | Yield, % | mp (°C) | Real mass * | <sup>1</sup> H NMR (DMSO-d <sub>6</sub> ), ppm                                                                                                                                                          |
|----------|----------|---------|-------------|---------------------------------------------------------------------------------------------------------------------------------------------------------------------------------------------------------|
| <b>1</b> | 86       | 167-169 | 240         | 7.81 (1H, d, H), 5.73 (1H, d, H), 3.44 and 2.48 (2 m, 4H, N(CH <sub>2</sub> ) <sub>2</sub> ), 1.97 (2H, m, 2CH), 1.20 (2H, m, CH <sub>2</sub> ), 0.88 (6H, broad d, 2CH <sub>3</sub> )                  |
| <b>2</b> | 72       | 105-108 | 226         | 7.73 (1H, d, H), 5.81 (1H, d, H), 3.21 (m, 4H, N(CH <sub>2</sub> ) <sub>2</sub> ), 1.53 (5H, broad m, CH <sub>2</sub> -CH-CH <sub>2</sub> ), 0.95 (3H, s, CH <sub>3</sub> )                             |
| <b>3</b> | 81       | 71-75   | 282         | 8.08 (1H, s, H), 3.87 and 2.92 (2 m, 4H, N(CH <sub>2</sub> ) <sub>2</sub> ), 2.42 (3H, s, COCH <sub>3</sub> ), 1.95 (2H, m, 2CH), 1.22 (2H, m, CH <sub>2</sub> ), 0.90 (6H, broad d, 2CH <sub>3</sub> ) |
| <b>4</b> | 94       | 64-68   | 268         | 8.09 (1H, s, H), 3.63 (m, 4H, N(CH <sub>2</sub> ) <sub>2</sub> ), 2.41 (3H, s, COCH <sub>3</sub> ), 1.51 (5H, broad m, CH <sub>2</sub> -CH-CH <sub>2</sub> ), 0.95 (3H, s, CH <sub>3</sub> )            |
| <b>5</b> | 78       | 153-155 | 285         | 8.30 (1H, s, H), 3.87 and 2.91 (2 m, 4H, N(CH <sub>2</sub> ) <sub>2</sub> ), 1.92 (2H, m, 2CH), 1.15 (2H, m, CH <sub>2</sub> ), 0.89 (6H, broad d, 2CH <sub>3</sub> )                                   |
| <b>6</b> | 83       | 136-137 | 271         | 8.22 (1H, s, H), 3.68 (m, 4H, N(CH <sub>2</sub> ) <sub>2</sub> ), 1.58 (5H, broad m, CH <sub>2</sub> -CH-CH <sub>2</sub> ), 0.96 (3H, s, CH <sub>3</sub> )                                              |

\* Determined using Finnigan SSQ-710
